# Supplementary material for: Enhancing Sustainability Competence Through International Collaboration: A Case Study of the Responsible Business Workshop
Source: Research Square preprint supplement (doi:10.21203/rs.3.rs-8085096/v1), 2025-12-09
Supplement: Supplementary file 1 [file 8718b3977fe5018954a7f8f2.xlsx]

## Sheet: All
Timestamp	1. Sustainability is a crucial consideration in all aspects of my life.	2. It is important to reduce our negative environmental impact.	3. I am willing to pay more for products and services that are socially responsible.	4. I always take steps to reduce my energy consumption at home (e.g. turning off lights, using energy-efficient appliances).	5. It is important for businesses and organizations to prioritize sustainability in their operations.	1. It is important to address economic inequalities in society.	2. It is important to address environmental inequalities, e.g., no community should face disadvantages in dealing with environmental hazards, disasters, or pollution.	3. It is important to address social inequalities, e.g., equal opportunities for all individuals, regardless of their race, gender, or socio-economic status.	4. I am committed to respecting the interests of future generations.	5. It is important for businesses and organizations to include equity in their operations.	1. I regard the protection of nature as an essential task for every individual.	2. It is important to learn the links and interdependence between living organisms and non-living components of the natural environment.	3. I am willing to engage in activities that promote environmental sustainability, such as recycling or planting trees.	4. Individuals have the power to make a positive impact on the natural environment, e.g., make sustainable choices in your daily life.	5. Plants and animals have as much right as humans to exist.	1. I am confident to identify and prioritize sustainability issues in a logical and structured manner.	2. I am able to analyze sustainability problems and develop holistic solutions that consider welfare of stakeholders in a systematic way.	3. I always rely on data and evidence when making decisions related to sustainability problems.	4. I always use frameworks or models to guide my thinking when approaching sustainability problems, e.g. triple bottom line, life cycle analysis.	5. It is important to use a structured approach when addressing sustainability problems.	1. I am able to analyze and evaluate information in a logical and objective manner.	2. I feel confident in my ability to identify assumptions and biases in the information I encounter.	3. I am able to identify and evaluate arguments for their validity and soundness.	4. I always seek out and consider alternative viewpoints when making decisions or solving problems.	5. I always take the time to question my own assumptions and biases in order to arrive at a more objective viewpoint.	1. I am able to define and clearly articulate a sustainability problem.	2. I am able to identify the key stakeholders and their perspectives on a sustainability problem.	3. I will consider the long-term consequences of a proposed solution to a sustainability problem.	4. I am able to identify and evaluate the social, economic, and environmental impacts of a sustainability problem.	5. I can establish an interdisciplinary approach to frame current sustainability challenges.	1. I am able to think innovatively about sustainable futures.	2. I am able to develop alternatives to envision a sustainable future.	3. I am able to identify potential pathways to achieve a sustainable future.	4. I am able to evaluate potential pathways to achieving a sustainable future, e.g., using data and information.	5. It is important to envision alternative sustainable futures in order to inspire action towards a more sustainable world.	1. I am willing to discontinue unsustainable practices.	2. I am willing to try alternative solutions for a sustainable future.	3. I am comfortable to deal with ambiguity and uncertainty when faced with complex sustainability situations.	4. I can easily adapt to new situation in order to accommodate changes in our complex world.	5. I am able to navigate and manage transitions effectively in sustainability contexts.	1. I am able to syntheize sustainability-related information and data from different disciplines.	2. I am able to connect ideas from different disciplines and angles to develop innovative solutions to sustainability problems.	3. It is important to consider multiple perspectives and ideas when addressing sustainability problems.	4. I am comfortable with stepping outside of my own discipline or area of expertise to explore different approaches to a sustainability problem.	5. I will seek out and incorporate input and feedback from others when exploring and developing solutions to sustainability problems.	1. I pay attention to policies regarding environmental damage, e.g. "polluter pays" policies.	2. It is important to advocate for sustainability policies.	3. We should demand political accountability for unsustainable behaviour.	4. I always seek out information about political structures and processes related to sustainability.
Before joining RBW
2023-03-04 17:12:05	4	4	3	3	4	4	2	3	4	3	3	4	5	5	4	4	3	4	3	4	4	4	3	4	4	4	3	4	3	4	3	2	4	3	5	5	4	4	4	3	4	4	4	2	4	4	3	3	4
2023-03-04 17:34:11	4	3	4	4	3	4	5	5	4	5	3	4	3	4	5	3	2	3	3	3	4	4	4	3	2	3	2	4	3	3	4	3	3	3	3	4	4	3	3	4	5	4	4	3	2	3	4	2	3
2023-03-05 11:16:02	4	4	4	4	4	4	4	4	4	4	4	4	4	4	4	4	4	4	4	4	4	4	4	4	4	4	4	4	4	4	4	4	4	4	4	4	4	4	4	4	4	4	4	4	4	4	4	4	4
2023-03-05 23:34:30	4	4	5	4	5	4	5	5	4	5	3	4	4	5	5	4	4	4	3	4	4	4	4	3	4	4	3	5	4	3	3	3	4	3	5	3	5	3	3	3	3	3	5	3	3	4	4	4	2
2023-03-05 23:58:58	4	5	3	5	5	5	5	5	4	5	4	4	5	5	5	4	4	5	4	4	4	4	3	3	4	4	4	4	4	4	4	3	3	3	5	3	4	4	4	3	3	3	5	4	4	2	5	4	2
2023-03-06 02:23:43	4	5	3	4	4	5	4	5	5	4	5	3	5	5	4	3	3	4	3	4	3	4	3	4	4	3	2	3	3	3	4	2	3	4	5	5	5	3	2	3	4	5	5	5	5	2	5	3	2
2023-03-06 09:17:22	3	4	2	3	4	4	5	5	4	4	5	3	4	4	3	3	3	4	4	3	4	3	3	4	4	3	3	2	4	3	3	4	4	4	4	4	4	3	4	4	4	3	4	4	4	2	4	4	3
2023-03-06 09:26:40	3	4	4	3	3	4	4	4	4	4	4	3	3	3	4	3	4	3	3	4	3	3	4	4	4	3	3	3	4	3	4	4	4	4	4	4	4	4	3	3	3	4	4	4	5	4	5	4	5
2023-03-06 09:54:34	5	5	4	5	4	4	5	4	4	4	5	3	4	4	5	3	4	2	2	2	3	4	3	4	2	4	3	4	4	5	5	4	4	4	5	4	5	3	5	4	4	4	5	5	5	2	5	2	2
2023-03-06 12:10:37	3	5	4	4	5	5	5	5	4	5	5	4	4	4	5	3	3	4	4	4	4	3	4	4	4	3	4	3	3	2	4	4	4	4	4	4	5	4	3	4	3	4	5	4	4	3	4	5	2
2023-03-06 13:17:00	3	4	2	5	5	5	3	2	5	4	3	4	5	4	5	4	2	3	3	5	3	3	2	4	4	2	2	4	2	4	2	4	3	2	5	5	4	5	4	3	2	3	5	5	5	4	2	2	5
2023-03-06 13:23:08	5	4	3	5	4	3	5	3	3	1	3	3	4	3	1	4	4	5	4	5	4	4	4	4	3	4	3	4	4	3	4	4	4	3	5	2	4	2	5	3	4	4	5	5	5	3	3	2	3
2023-03-06 15:17:57	5	5	5	3	5	5	5	5	5	5	5	5	5	5	5	4	2	3	3	5	4	4	4	5	5	4	5	4	5	4	4	4	4	4	5	3	4	4	4	4	4	4	5	5	5	5	5	5	3
2023-03-06 18:58:55	4	4	4	4	4	4	4	4	4	4	4	4	4	4	4	3	4	4	4	4	4	4	4	4	4	4	4	4	4	4	3	4	4	4	4	4	4	4	4	4	4	4	4	4	4	4	4	4	4
2023-03-06 19:14:21	3	5	4	4	4	4	5	5	5	5	5	5	5	5	2	3	2	4	3	5	3	3	3	4	2	4	4	5	4	2	4	4	4	4	5	5	5	4	5	4	3	3	5	5	5	4	5	5	4
2023-03-06 19:37:37	4	5	3	5	5	5	4	5	5	5	5	3	5	4	4	5	4	5	4	5	5	3	4	5	3	3	4	3	4	3	2	3	3	4	4	5	5	2	2	4	3	2	5	4	5	4	5	5	4
2023-03-06 19:40:11	4	3	2	3	5	4	3	3	4	4	4	3	2	4	3	4	3	5	4	4	4	4	4	4	5	4	3	4	3	4	4	4	4	3	4	3	3	2	2	3	3	2	4	4	3	2	3	4	3
2023-03-06 19:54:47	5	4	4	2	5	3	2	4	4	4	5	4	4	5	4	3	4	5	4	4	4	3	4	3	4	4	4	3	5	2	5	3	4	3	5	2	4	3	4	4	4	3	4	5	4	4	5	3	4
2023-03-06 20:10:00	4	5	4	4	4	4	3	4	3	5	5	4	5	4	4	3	4	4	3	4	3	2	4	4	4	3	4	4	4	3	4	4	4	4	4	5	5	3	2	3	4	4	5	4	4	5	4	4	3
2023-03-06 23:30:43	5	5	3	3	4	4	4	5	4	4	4	4	4	4	3	3	4	3	2	3	4	4	4	4	4	4	4	4	4	4	3	3	4	3	4	3	4	3	3	3	3	3	4	3	4	3	4	3	3
2023-03-07 01:19:32	3	3	4	4	3	4	5	4	4	3	4	3	4	4	3	4	4	4	4	4	4	4	4	3	4	4	4	4	4	4	4	4	4	4	3	4	4	4	4	4	4	4	4	4	4	4	4	4	4
2023-03-07 01:20:12	4	5	3	4	5	5	5	4	5	5	3	5	2	5	5	4	4	2	3	4	4	2	4	5	3	3	4	4	4	4	4	4	4	3	5	3	3	3	4	4	3	4	5	4	4	4	4	5	3
2023-03-07 02:18:04	5	5	4	5	5	5	5	5	5	5	5	4	4	5	5	4	3	4	4	5	4	3	4	4	4	4	4	5	4	4	4	4	5	5	5	5	5	4	5	4	4	4	5	4	5	4	5	5	3
2023-03-07 08:32:43	5	5	5	4	4	4	5	4	4	4	5	5	4	4	5	4	5	5	4	4	4	5	5	4	5	4	5	5	4	4	4	5	5	4	4	5	4	3	3	3	4	4	5	4	3	4	3	4	5
2023-03-07 11:21:13	4	4	4	3	4	5	5	5	5	5	4	4	4	4	4	4	4	4	4	4	4	4	5	5	5	4	4	5	5	5	5	5	5	5	5	4	5	5	4	4	4	5	5	5	5	5	4	4	4
2023-03-07 11:26:53	4	5	3	4	5	2	2	4	4	4	4	5	5	5	5	3	4	3	2	2	3	4	3	4	3	4	4	4	4	4	4	4	4	4	4	5	4	4	4	4	3	4	4	4	4	5	5	5	4
2023-03-07 11:45:56	5	5	4	5	5	5	5	5	5	5	5	5	5	5	5	4	4	5	5	5	4	4	4	5	5	5	4	5	5	3	4	4	4	4	5	4	5	5	5	4	4	4	5	4	4	5	5	5	5
2023-03-07 12:59:03	4	5	3	3	4	4	5	5	4	3	3	3	4	4	4	3	3	3	2	3	3	3	3	4	3	3	2	4	4	3	3	4	3	4	4	3	4	3	4	3	3	3	4	4	5	3	4	4	2
2023-03-07 13:03:18	2	5	1	2	5	4	5	5	3	5	5	4	3	4	5	2	3	5	4	3	3	2	3	4	4	4	2	2	2	2	3	3	3	3	5	4	5	2	2	3	3	2	5	5	5	2	5	4	5
2023-03-07 13:39:05	3	5	2	3	5	5	5	5	4	5	5	3	4	5	5	2	2	4	1	4	4	4	4	4	4	2	4	4	3	2	2	2	3	5	5	2	4	2	2	2	4	3	2	2	4	1	4	5	2
2023-03-07 14:12:03	5	5	5	5	5	5	3	5	5	3	5	5	4	5	4	2	3	5	3	5	5	2	3	4	4	3	4	4	5	3	2	3	4	2	5	5	5	3	3	3	4	4	5	5	5	3	5	5	4
2023-03-07 14:38:33	4	3	3	5	5	5	2	5	5	4	3	4	4	2	5	4	4	4	4	5	5	4	5	5	5	4	5	4	4	4	3	3	4	3	3	2	4	5	3	3	3	3	4	4	3	5	4	5	5
2023-03-07 16:36:22	4	4	3	4	4	4	4	4	4	4	4	4	4	4	4	4	4	4	4	5	4	4	4	4	4	5	4	4	4	4	4	4	4	5	4	4	4	3	3	4	4	4	5	4	4	4	4	4	4
2023-03-07 16:39:49	5	5	5	5	5	5	5	5	5	5	5	5	5	5	5	5	5	5	5	5	5	5	5	5	5	5	5	5	5	5	5	5	5	5	5	5	5	5	5	5	5	5	5	5	5	5	5	5	5
2023-03-07 18:25:16	4	4	4	4	4	4	4	4	4	4	4	4	4	4	4	4	4	4	4	4	4	4	4	4	4	4	4	4	4	4	4	3	4	4	5	5	4	5	4	5	5	4	5	4	4	4	4	5	5
2023-03-08 01:17:42	5	5	4	5	4	3	4	4	5	5	4	5	5	5	4	3	4	4	4	4	5	4	3	5	4	4	5	5	4	4	3	4	3	4	5	5	5	4	5	4	5	5	4	5	4	5	5	5	4
2023-03-08 01:34:45	4	5	4	4	4	3	5	4	5	5	5	5	4	5	4	5	5	5	4	5	5	5	5	4	4	4	4	4	4	4	5	5	4	4	4	5	4	4	4	4	5	4	5	5	5	4	5	3	5
2023-03-13 13:46:42	4	4	4	4	4	4	4	4	4	4	5	5	4	4	4	4	4	4	4	4	5	5	4	5	5	4	4	5	4	4	3	3	3	4	4	4	4	4	4	4	4	4	4	4	4	4	4	4	3
After joining RBW
2023-05-29 20:23:05	4	4	5	5	4	4	5	4	5	4	4	4	5	4	4	5	4	4	5	4	4	4	4	4	4	4	4	4	4	3	5	4	4	4	4	4	5	4	4	4	4	4	5	5	4	5	5	3	4
2023-05-29 21:49:45	5	5	5	4	5	5	5	5	4	4	5	5	5	5	5	4	4	5	3	5	4	5	4	4	4	4	5	4	5	4	4	3	3	3	5	4	4	4	4	4	3	4	5	3	4	3	5	5	3
2023-05-29 23:33:32	5	5	3	3	3	5	3	5	5	5	4	5	5	5	3	4	4	5	4	5	5	5	4	5	5	5	5	4	5	5	4	4	3	5	5	5	5	5	5	5	5	5	5	5	5	5	5	5	5
2023-05-30 09:41:04	5	5	4	4	5	4	4	4	4	5	5	4	4	5	4	4	4	3	5	4	4	4	4	4	4	4	4	4	4	4	4	4	5	4	4	4	4	4	4	4	4	4	5	4	5	4	5	5	4
2023-05-30 16:30:09	4	4	4	4	4	3	4	3	4	4	4	4	4	4	4	4	4	4	4	4	4	4	4	4	4	4	4	4	4	4	4	4	4	5	4	4	4	4	4	4	4	4	4	4	4	4	4	4	4
2023-05-30 17:05:28	5	5	4	5	5	5	5	5	4	5	5	5	5	5	5	5	5	5	5	5	4	5	4	5	5	5	5	5	5	5	4	5	4	5	5	5	5	4	4	5	5	5	5	4	5	4	5	5	5
2023-05-30 22:24:10	5	2	4	4	5	5	5	4	4	4	5	3	3	3	3	2	4	5	2	5	4	3	3	5	3	4	4	5	5	3	4	4	5	3	4	5	5	5	4	5	4	4	4	5	4	4	5	4	2
2023-05-31 19:34:34	5	5	5	5	3	4	5	5	4	5	5	5	5	5	4	2	3	4	3	5	3	3	4	4	2	4	4	4	4	4	4	4	4	2	4	5	5	5	5	5	5	5	5	4	4	4	4	4	4
2023-06-03 14:54:36	5	4	4	2	4	3	4	4	5	5	4	4	4	4	4	4	5	5	4	4	5	5	5	5	5	4	4	4	5	5	5	5	5	5	5	3	4	4	4	4	4	4	5	5	5	4	4	5	4
2023-06-03 22:40:22	4	4	4	4	4	4	4	4	4	4	4	4	4	4	5	4	4	4	5	4	4	4	4	4	4	4	5	4	4	4	4	4	4	5	4	5	4	4	4	4	5	4	4	4	4	4	4	4	3
2023-06-04 01:15:47	5	5	5	5	5	5	4	5	5	5	5	5	5	5	5	5	5	5	5	5	5	5	5	5	5	5	5	5	5	5	5	5	5	5	5	4	5	5	5	5	5	5	5	5	5	5	5	5	5
2023-06-05 00:05:10	5	5	5	5	5	5	5	4	5	4	5	5	4	5	5	5	4	5	5	5	4	4	5	5	5	5	5	5	5	5	4	5	5	5	5	5	5	4	4	5	5	5	5	5	5	5	5	5	4
2023-06-09 15:21:28	5	5	4	4	5	3	4	4	5	5	4	5	5	5	5	5	5	4	4	5	4	4	4	5	4	4	4	5	4	4	4	4	4	4	4	4	5	4	5	5	4	4	5	5	5	5	5	5	4
2023-06-10 00:34:55	5	5	4	5	5	5	5	5	5	5	5	5	5	5	5	5	4	4	4	5	4	5	5	5	4	4	5	5	5	4	4	5	5	4	5	5	5	4	4	4	4	5	5	5	5	4	5	5	3
2023-06-10 01:21:10	4	4	4	3	4	4	4	4	4	5	4	4	4	3	4	4	4	4	4	4	5	4	4	4	4	4	4	4	4	4	4	4	4	4	4	3	4	4	4	4	4	4	5	4	4	3	4	4	3
2023-06-14 22:10:06	5	4	5	3	4	4	4	5	5	5	5	4	5	4	4	3	3	4	4	5	4	4	5	5	4	4	4	4	5	4	5	5	4	4	4	5	4	4	3	4	4	5	5	4	4	5	5	4	4
2023-06-16 10:11:39	5	4	4	5	5	5	4	5	5	5	5	4	5	4	5	3	3	3	3	3	4	4	3	4	2	3	2	4	4	3	3	4	4	3	5	5	5	3	5	3	4	5	5	5	5	3	4	4	2
2023-06-16 18:39:53	5	5	5	5	5	5	5	5	5	5	5	5	5	5	5	5	5	5	5	5	5	5	5	5	5	5	5	5	5	5	5	5	5	5	5	5	5	5	5	5	5	5	5	5	5	5	5	5	5
2023-06-19 14:46:30	4	4	3	4	4	4	4	4	3	4	4	3	4	3	4	4	3	4	4	4	3	4	3	4	4	4	3	4	4	4	3	3	4	4	4	3	4	3	3	3	4	4	4	3	4	4	4	4	3
2023-06-20 13:48:53	2	4	4	4	5	4	4	4	4	5	5	5	4	5	5	5	4	5	3	4	4	4	3	4	4	4	3	4	4	4	3	4	4	5	5	3	5	5	5	3	4	4	5	4	4	2	5	4	2
2023-06-21 13:48:52	4	4	3	5	4	5	5	5	3	4	4	3	4	5	4	4	4	3	4	3	4	3	4	4	3	4	4	4	4	3	4	4	4	4	4	4	5	3	5	4	3	3	5	5	4	4	4	4	3
2023-06-21 13:51:40	4	5	4	4	5	3	3	5	4	4	4	4	4	3	5	3	3	4	3	5	3	3	4	5	4	3	3	4	3	3	5	4	4	4	5	4	5	5	4	4	3	3	4	4	4	5	4	5	5
2023-06-21 13:54:17	5	5	4	5	5	5	5	5	5	5	5	5	5	5	5	5	5	5	5	5	5	4	5	4	5	4	5	5	5	5	5	4	4	4	5	5	5	5	5	5	5	5	5	5	5	5	5	5	5
2023-06-21 14:35:03	5	5	4	5	5	4	4	5	5	5	5	5	4	5	3	5	4	4	5	5	5	5	5	5	5	5	5	5	5	5	4	5	4	4	5	5	5	4	5	4	5	4	5	4	5	3	5	4	4
2023-06-21 14:54:39	3	3	4	4	4	5	5	4	4	4	4	4	5	3	5	4	4	4	4	4	4	4	4	4	4	4	4	4	4	4	4	4	4	4	4	4	4	4	4	4	4	4	4	4	4	5	4	4	4
2023-06-21 21:30:43	4	5	4	5	4	5	5	5	4	5	5	5	5	4	4	4	5	5	3	4	5	5	4	4	4	4	4	5	5	4	3	4	5	4	5	5	5	4	4	5	5	5	5	5	4	5	5	4	4
2023-06-22 14:31:49	4	5	5	3	5	5	4	5	5	3	5	5	5	5	5	2	4	4	4	4	4	3	4	3	2	5	5	5	5	3	5	5	4	4	5	5	5	5	5	5	4	4	5	4	5	5	5	5	4
2023-06-23 16:05:16	4	5	4	3	5	5	5	5	4	4	4	5	4	5	5	4	3	5	4	4	4	4	3	4	5	4	4	3	5	4	4	3	4	5	4	4	4	4	5	5	3	4	5	4	5	4	5	4	4
2023-06-23 16:08:03	5	5	4	5	5	5	5	5	5	5	5	5	5	5	5	5	4	5	5	5	4	4	5	4	5	4	4	5	5	5	5	4	5	4	5	5	5	5	4	5	4	5	5	5	5	5	5	5	4
2023-06-23 16:23:44	2	5	3	4	5	5	5	5	5	5	5	5	5	5	5	4	4	5	4	5	4	4	4	4	3	3	3	4	4	3	3	3	3	4	5	3	3	4	4	3	3	4	5	4	4	3	5	4	3
2023-06-23 18:24:54	4	5	2	4	3	4	4	4	4	3	4	4	4	5	3	4	4	3	5	3	4	4	3	4	4	3	4	4	5	4	4	4	5	3	3	5	3	2	4	5	5	3	3	4	4	4	4	3	5
2023-06-23 18:25:38	4	5	4	5	5	4	5	5	4	5	5	4	4	4	5	4	4	4	4	4	4	4	4	4	5	4	4	4	4	4	4	4	4	4	4	4	4	4	4	4	4	4	4	4	4	4	4	4	5
[truncated: 11 more columns]

## Sheet: Control group (CUHK)
Timestamp	1. Sustainability is a crucial consideration in all aspects of my life.	2. It is important to reduce our negative environmental impact.	3. I am willing to pay more for products and services that are socially responsible.	4. I always take steps to reduce my energy consumption at home (e.g. turning off lights, using energy-efficient appliances).	5. It is important for businesses and organizations to prioritize sustainability in their operations.	1. It is important to address economic inequalities in society.	2. It is important to address environmental inequalities, e.g., no community should face disadvantages in dealing with environmental hazards, disasters, or pollution.	3. It is important to address social inequalities, e.g., equal opportunities for all individuals, regardless of their race, gender, or socio-economic status.	4. I am committed to respecting the interests of future generations.	5. It is important for businesses and organizations to include equity in their operations.	1. I regard the protection of nature as an essential task for every individual.	2. It is important to learn the links and interdependence between living organisms and non-living components of the natural environment.	3. I am willing to engage in activities that promote environmental sustainability, such as recycling or planting trees.	4. Individuals have the power to make a positive impact on the natural environment, e.g., make sustainable choices in your daily life.	5. Plants and animals have as much right as humans to exist.	1. I am confident to identify and prioritize sustainability issues in a logical and structured manner.	2. I am able to analyze sustainability problems and develop holistic solutions that consider welfare of stakeholders in a systematic way.	3. I always rely on data and evidence when making decisions related to sustainability problems.	4. I always use frameworks or models to guide my thinking when approaching sustainability problems, e.g. triple bottom line, life cycle analysis.	5. It is important to use a structured approach when addressing sustainability problems.	1. I am able to analyze and evaluate information in a logical and objective manner.	2. I feel confident in my ability to identify assumptions and biases in the information I encounter.	3. I am able to identify and evaluate arguments for their validity and soundness.	4. I always seek out and consider alternative viewpoints when making decisions or solving problems.	5. I always take the time to question my own assumptions and biases in order to arrive at a more objective viewpoint.	1. I am able to define and clearly articulate a sustainability problem.	2. I am able to identify the key stakeholders and their perspectives on a sustainability problem.	3. I will consider the long-term consequences of a proposed solution to a sustainability problem.	4. I am able to identify and evaluate the social, economic, and environmental impacts of a sustainability problem.	5. I can establish an interdisciplinary approach to frame current sustainability challenges.	1. I am able to think innovatively about sustainable futures.	2. I am able to develop alternatives to envision a sustainable future.	3. I am able to identify potential pathways to achieve a sustainable future.	4. I am able to evaluate potential pathways to achieving a sustainable future, e.g., using data and information.	5. It is important to envision alternative sustainable futures in order to inspire action towards a more sustainable world.	1. I am willing to discontinue unsustainable practices.	2. I am willing to try alternative solutions for a sustainable future.	3. I am comfortable to deal with ambiguity and uncertainty when faced with complex sustainability situations.	4. I can easily adapt to new situation in order to accommodate changes in our complex world.	5. I am able to navigate and manage transitions effectively in sustainability contexts.	1. I am able to syntheize sustainability-related information and data from different disciplines.	2. I am able to connect ideas from different disciplines and angles to develop innovative solutions to sustainability problems.	3. It is important to consider multiple perspectives and ideas when addressing sustainability problems.	4. I am comfortable with stepping outside of my own discipline or area of expertise to explore different approaches to a sustainability problem.	5. I will seek out and incorporate input and feedback from others when exploring and developing solutions to sustainability problems.	1. I pay attention to policies regarding environmental damage, e.g. "polluter pays" policies.	2. It is important to advocate for sustainability policies.	3. We should demand political accountability for unsustainable behaviour.	4. I always seek out information about political structures and processes related to sustainability.
In the beginning of term
2023-03-09 15:00:33	3	4	4	4	3	4	4	4	4	4	3	3	2	3	2	2	2	3	2	4	4	4	3	4	4	3	3	4	3	2	3	2	3	3	4	4	4	3	2	3	3	4	4	4	3	3	4	4	3
2023-03-09 15:01:47	3	4	4	5	3	3	3	2	4	3	4	4	4	4	1	4	4	3	3	5	3	4	4	5	3	2	3	4	4	3	3	3	2	2	2	2	4	3	2	3	3	4	4	4	4	5	5	5	5
2023-03-09 15:23:35	4	5	3	4	5	4	4	4	4	4	4	3	4	4	4	3	3	2	3	3	3	2	2	2	2	2	2	3	3	2	2	2	2	3	4	4	4	3	4	4	3	3	4	3	4	3	4	4	3
2023-03-09 20:53:04	4	4	4	4	4	4	4	4	4	4	4	4	4	4	4	4	4	4	2	4	3	3	3	5	4	4	4	4	3	3	3	3	4	3	4	4	4	4	3	4	3	3	4	4		3	4	5	3
2023-03-09 21:53:22	4	4	4	5	5	4	4	4	4	4	4	4	4	4	4	3	3	3	3	4	3	3	3	3	3	3	3	4	4	3	3	3	3	3	4	4	4	3	3	3	3	3	4	4	3	4	4	4	3
2023-03-10 03:20:18	2	4	4	3	4	4	4	4	4	4	5	5	5	5	3	4	4	4	4	4	4	4	3	5	4	4	4	4	4	4	4	4	3	3	3	3	4	2	4	4	4	4	4	4	4	4	4	4	3
2023-03-12 12:31:28	3	4	3	3	4	4	4	4	3	4	3	4	3	4	3	4	3	3	3	3	4	4	4	4	4	4	4	4	4	3	2	2	3	3	3	4	4	3	3	3	3	3	3	3	3	3	3	3	3
2023-03-14 15:59:48	4	4	4	4	4	4	3	4	4	4	4	4	4	4	4	3	4	3	3	4	3	4	4	3	4	4	4	4	4	4	3	3	3	3	3	4	4	4	4	4	4	4	4	4	4	3	4	4	3
2023-03-15 15:07:16	4	5	5	5	4	4	4	4	5	4	4	4	5	4	3	4	4	4	3	4	4	3	4	4	5	4	3	4	4	4	4	3	3	3	4	4	5	3	4	4	4	4	5	5	4	5	4	4	3
2023-03-20 11:18:10	4	4	4	4	3	3	3	3	3	3	3	3	3	3	3	3	3	3	3	3	3	3	3	3	3	3	3	3	3	3	3	3	3	3	3	3	3	3	3	3	3	3	3	3	3	3	3	3	3
2023-03-20 11:19:21	4	4	4	5	3	4	4	4	4	3	4	4	4	5	4	3	4	3	4	3	3	3	4	4	4	4	3	4	4	5	4	3	5	4	4	4	4	3	4	4	3	4	3	4	4	4	3	4	4
2023-03-20 11:19:51	3	3	3	4	4	4	3	3	4	2	3	2	4	3	2	3	3	2	4	4	3	4	3	3	3	4	3	3	4	4	3	3	3	3	2	3	4	4	4	2	4	4	4	3	2	3	3	3	3
2023-03-20 11:19:52	4	4	4	4	5	5	5	5	5	5	5	5	4	5	4	5	5	5	2	4	4	4	4	4	4	4	4	5	4	5	5	5	3	3	5	4	4	4	4	4	4	4	4	4	4	5	5	5	5
2023-03-20 11:19:58	4	5	3	4	5	4	4	4	3	4	4	4	4	4	5	4	3	3	4	4	4	3	4	4	4	4	4	3	5	4	4	4	4	4	4	3	4	4	4	4	4	3	4	3	3	3	3	4	3
2023-03-20 11:22:13	2	2	3	3	2	2	3	1	3	2	2	1	2	2	2	2	1	1	3	1	2	3	2	2	3	2	3	2	3	3	1	3	2	3	3	2	2	3	2	1	1	2	2	1	3	3	3	4	2
At the end of term
2023-06-27 12:58:11	3	5	3	4	3	4	4	4	4	4	5	5	4	4	5	4	3	4	3	4	3	3	4	4	4	4	3	4	4	4	3	3	3	2	3	4	5	3	3	3	3	4	5	3	3	5	4	5	3
2023-06-27 19:37:33	4	4	2	2	5	3	4	4	3	4	4	3	4	4	3	4	4	3	3	4	3	4	3	3	2	3	3	4	4	3	4	4	4	3	3	4	5	3	3	3	2	2	4	3	3	4	4	2	2
2023-06-27 22:10:25	4	4	5	5	5	5	5	5	5	5	5	5	5	5	5	5	5	5	5	5	4	3	4	5	4	4	5	5	5	5	5	5	5	5	5	4	5	5	5	5	5	5	5	5	5	5	5	5	3
2023-06-29 11:42:59	4	5	4	5	5	3	3	4	4	4	5	4	4	5	5	4	4	3	3	4	4	4	4	4	4	3	4	4	4	4	3	4	4	3	3	4	4	3	3	3	4	4	4	3	4	3	3	3	4
2023-07-03 23:02:47	4	4	4	4	4	3	3	3	4	3	3	3	4	4	5	3	4	4	3	4	4	3	4	4	4	5	4	5	4	4	4	3	4	4	4	4	5	4	4	4	4	3	4	4	3	3	4	4	3
2023-07-19 11:44:07	4	4	3	3	4	5	5	5	4	4	4	5	4	4	4	4	4	4	2	4	4	4	4	4	4	4	4	4	4	4	2	3	3	4	4	4	4	4	4	4	4	4	4	4	4	4	4	3	3
[truncated: 11 more columns]
